# Supplementary material for: Dairy Consumption and the Incidence of Hyperglycemia and the Metabolic Syndrome: Results from a French prospective study, Data from the Epidemiological Study on the Insulin Resistance Syndrome (DESIR)
Source: PubMed Central journal article supplement — Diabetes Care. 2011 Mar 21;34(4):813–7. doi: 10.2337/dc10-1772 (PMC3064033; doi:10.2337/dc10-1772), 2011-03-21
Supplement: supp_34.4.813v101772_DC101772SupplementaryData.pdf [file supp_34.4.813v101772_DC101772SupplementaryData.pdf]

SUPPLEMENTARY DATA

**Supplementary Table 1. Mean values, at baseline and nine years, of parameters associated with the metabolic syndrome, according to dairy product consumption (except cheese) during the 9-year follow-up, the D.E.S.I.R. study.**

|                                   | Group 1-low<br>730 |                  | Group 2<br>653   |                  | Group 3<br>1345  |                  | Group 4-high<br>707 |                  | P ANCOVA* |          |          |           |
|-----------------------------------|--------------------|------------------|------------------|------------------|------------------|------------------|---------------------|------------------|-----------|----------|----------|-----------|
|                                   | T0                 | T9               | T0               | T9               | T0               | T9               | T0                  | T9               | †         | ‡        | §        |           |
| n                                 |                    |                  |                  |                  |                  |                  |                     |                  |           |          |          |           |
| BMI (kg/m <sup>2</sup> )          | 24.4 ± 0.1         | 25.7 ± 0.1       | 24.5 ± 0.1       | 25.6 ± 0.2       | 24.4 ± 0.1       | 25.4 ± 0.10      | 24.2 ± 0.1          | 25.2 ± 0.2       | 0.18      | 0.9<br>3 | 0.0<br>1 | 0.7<br>6  |
| Waist circumference (cm) in Men   | 88.8 ± 0.2         | 92.1 ± 0.3       | 88.9 ± 0.2       | 91.6 ± 0.3       | 88.5 ± 0.2       | 91.8 ± 0.2       | 88.4 ± 0.3          | 91.4 ± 0.3       | 0.36      |          | 0.3<br>6 |           |
| Waist circumference (cm) in Women | 75.9 ± 0.3         | 80.8 ± 0.4       | 76.0 ± 0.3       | 80.2 ± 0.4       | 76.2 ± 0.2       | 80.5 ± 0.2       | 76.4 ± 0.3          | 80.4 ± 0.3       | 0.81      |          | 0.3<br>7 |           |
| Systolic blood pressure (mmHg)    | 131.2 ± 0.5        | 137.1 ± 0.6      | 130.5 ± 0.5      | 135.5 ± 0.7      | 130.7 ± 0.4      | 135.0 ± 0.5      | 129.9 ± 0.5         | 134.9 ± 0.7      | 0.08      | 0.8<br>0 | 0.2<br>5 | 0.0<br>3  |
| Diastolic blood pressure (mmHg)   | 79.9 ± 0.3         | 81.6 ± 0.4       | 79.8 ± 0.4       | 81.2 ± 0.4       | 79.8 ± 0.2       | 80.5 ± 0.3       | 78.7 ± 0.3          | 80.0 ± 0.4       | 0.00<br>5 | 0.4<br>2 | 0.1<br>8 | 0.0<br>20 |
| Insulin (pmol/l)                  | 40.3 (38.9-41.7)   | 52.6 (50.7-54.7) | 39.2 (37.9-40.6) | 50.9 (48.9-52.9) | 39.0 (38.1-40.0) | 51.6 (50.2-53.0) | 38.5 (37.2-39.9)    | 50.7 (48.8-52.7) | 0.29      | 0.4<br>9 | 0.8<br>8 | 0.9<br>9  |
| HDL-C (mmol/l) in Men             | 1.54 ± 0.02        | 1.42 ± 0.01      | 1.51 ± 0.02      | 1.39 ± 0.02      | 1.48 ± 0.01      | 1.40 ± 0.01      | 1.45 ± 0.02         | 1.37 ± 0.02      | 0.03      |          | 0.0<br>4 |           |
| HDL-C (mmol/l) in Women           | 1.82 ± 0.02        | 1.67 ± 0.02      | 1.82 ± 0.02      | 1.65 ± 0.02      | 1.79 ± 0.01      | 1.64 ± 0.01      | 1.79 ± 0.02         | 1.62 ± 0.02      | 0.39      |          | 0.7<br>6 |           |
| Triglycerides (mmol/l)            | 0.98 (0.96-1.00)   | 1.10 (1.07-1.14) | 0.93 (0.90-0.97) | 1.05 (1.01-1.08) | 0.95 (0.93-0.98) | 1.04 (1.02-1.07) | 0.98 (0.94-1.01)    | 1.06 (1.02-1.09) | 0.07      | 0.9<br>6 | 0.2<br>7 | 0.3<br>7  |

Data are LS means ± SEM, or geometric means (95% CI). \*ANCOVA for repeated measures, adjusted for sex, age, smoking, physical activity, fat intake, mean BMI. †Average effect of dairy ‡interaction effect on average between dairy and sex. §Interaction effect between dairy and time. ||Interaction effect between dairy, sex and time

SUPPLEMENTARY DATA

**Supplementary Table 2. Mean values, at baseline and nine years, of parameters associated with the metabolic syndrome according to cheese consumption during the 9-year follow-up, the D.E.S.I.R. study.**

|                                   | Group 1-low<br>1043 |                  | Group 2-medium<br>769 |                  | Group 3-high<br>1623 |                  |       |      |      |      |
|-----------------------------------|---------------------|------------------|-----------------------|------------------|----------------------|------------------|-------|------|------|------|
|                                   | T0                  | T9               | T0                    | T9               | T0                   | T9               |       |      |      |      |
| BMI (kg/m <sup>2</sup> )          | 24.2 ± 0.1          | 25.3 ± 0.1       | 24.6 ± 0.1            | 25.8 ± 0.1       | 24.4 ± 0.1           | 25.4 ± 0.1       | 0.03  | 0.93 | 0.04 | 0.70 |
| Waist circumference (cm) in Men   | 88.8 ± 0.2          | 92.4 ± 0.3       | 88.6 ± 0.2            | 91.9 ± 0.3       | 88.6 ± 0.2           | 91.5 ± 0.2       | 0.15  |      | 0.08 |      |
| Waist circumference (cm) in Women | 76.2 ± 0.2          | 80.7 ± 0.3       | 76.2 ± 0.2            | 81.0 ± 0.3       | 76.1 ± 0.2           | 80.0 ± 0.3       | 0.18  |      | 0.09 |      |
| Systolic blood pressure (mmHg)    | 131.5 ± 0.4         | 136.0 ± 0.5      | 129.9 ± 0.5           | 135.2 ± 0.6      | 130.2 ± 0.4          | 135.5 ± 0.4      | 0.12  | 0.19 | 0.44 | 0.53 |
| Diastolic blood pressure (mmHg)   | 80.1 ± 0.3          | 81.7 ± 0.3       | 79.7 ± 0.3            | 80.5 ± 0.3       | 79.2 ± 0.2           | 80.5 ± 0.2       | 0.004 | 0.11 | 0.58 | 0.20 |
| Insulin (pmol/l)                  | 40.1 (39.0-41.3)    | 53.3 (51.5-55.0) | 38.9 (37.6-40.1)      | 51.3 (49.5-53.1) | 38.9 (38.0-39.9)     | 50.8 (49.5-54.9) | 0.07  | 0.11 | 0.74 | 0.47 |
| HDL-C (mmol/l) in Men             | 1.50 ± 0.02         | 1.39 ± 0.02      | 1.50 ± 0.02           | 1.41 ± 0.02      | 1.49 ± 0.01          | 1.40 ± 0.01      | 0.85  |      | 0.47 |      |
| HDL-C (mmol/l) in Women           | 1.80 ± 0.02         | 1.64 ± 0.01      | 1.80 ± 0.02           | 1.63 ± 0.02      | 1.80 ± 0.02          | 1.65 ± 0.01      | 0.87  |      | 0.61 |      |
| Triglycerides (mmol/l)            | 0.99 (0.96-1.03)    | 1.11 (1.08-1.14) | 0.95 (0.92-0.98)      | 1.06 (1.03-1.09) | 0.95 (0.92-0.97)     | 1.03 (1.01-1.05) | 0.001 | 0.20 | 0.32 | 0.20 |

Data are LS means ± SEM, or geometric means (95% CI). \*ANCOVA for repeated measures, adjusted for sex, age, smoking, physical activity, fat intake, mean BMI. †Average effect of cheese. ‡Interaction effect on average between cheese and sex. §Interaction effect between cheese and time. ||Interaction effect between cheese, sex and time

SUPPLEMENTARY DATA

**Supplementary Table 3. Mean values, at baseline and nine years, of parameters associated with the metabolic syndrome according to the dietary calcium density consumption during the 9-year follow-up, the D.E.S.I.R. study.**

|                                   | quartile 1<br>843 |                  | quartile 2<br>866 |                  | quartile 3<br>875 |                  | quartile 4<br>851 |                  | P ANCOVA* |           |            |
|-----------------------------------|-------------------|------------------|-------------------|------------------|-------------------|------------------|-------------------|------------------|-----------|-----------|------------|
|                                   | T0                | T9               | T0                | T9               | T0                | T9               | T0                | T9               | †         | ‡         | §          |
| BMI (kg/m <sup>2</sup> )          | 24.1 ± 0.1        | 25.4 ± 0.1       | 24.5 ± 0.1        | 25.6 ± 0.1       | 24.4 ± 0.1        | 25.5 ± 0.1       | 24.5 ± 0.1        | 25.4 ± 0.1       | 0.46      | 0.67      | 0.000<br>9 |
| Waist circumference (cm) in Men   | 88.6 ± 0.2        | 92.3 ± 0.3       | 88.5 ± 0.2        | 92.1 ± 0.3       | 88.7 ± 0.2        | 91.8 ± 0.3       | 88.8 ± 0.2        | 91.0 ± 0.3       | 0.30      |           | 0.000<br>8 |
| Waist circumference (cm) in Women | 76.3 ± 0.2        | 81.3 ± 0.3       | 76.0 ± 0.2        | 80.1 ± 0.3       | 76.4 ± 0.2        | 80.3 ± 0.3       | 75.9 ± 0.3        | 80.0 ± 0.3       | 0.05      |           | 0.03       |
| Systolic blood pressure (mmHg)    | 131.4 ± 0.5       | 136.7 ± 0.6      | 130.3 ± 0.5       | 134.7 ± 0.6      | 130.6 ± 0.5       | 135.9 ± 0.6      | 129.9 ± 0.5       | 134.9 ± 0.6      | 0.02      | 0.10      | 0.60<br>1  |
| Diastolic blood pressure (mmHg)   | 80.1 ± 0.3        | 81.7 ± 0.3       | 79.7 ± 0.3        | 80.7 ± 0.3       | 79.5 ± 0.3        | 81.0 ± 0.3       | 79.0 ± 0.3        | 79.9 ± 0.3       | 0.00<br>1 | 0.15      | 0.39<br>0  |
| Insulin (pmol/l)                  | 40.1 (38.9-41.3)  | 53.3 (51.4-55.1) | 39.1 (38.1-40.4)  | 51.3 (49.6-53.1) | 38.2 (37.0-39.3)  | 49.6 (48.0-51.3) | 39.4 (38.2-40.6)  | 51.9 (50.1-53.7) | 0.02      | 0.00<br>2 | 0.83<br>5  |
| HDL-C (mmol/l) in Men             | 1.53 ± 0.02       | 1.40 ± 0.01      | 1.51 ± 0.02       | 1.40 ± 0.01      | 1.48 ± 0.02       | 1.39 ± 0.01      | 1.47 ± 0.02       | 1.40 ± 0.01      | 0.25      |           | 0.02       |
| HDL-C (mmol/l) in Women           | 1.77 ± 0.02       | 1.62 ± 0.02      | 1.83 ± 0.02       | 1.65 ± 0.02      | 1.79 ± 0.02       | 1.65 ± 0.02      | 1.82 ± 0.02       | 1.65 ± 0.02      | 0.16      |           | 0.29       |
| Triglycerides (mmol/l)            | 0.98 (0.95-1.01)  | 1.11 (1.08-1.15) | 0.96 (0.94-0.99)  | 1.05 (1.02-1.08) | 0.94 (0.91-0.97)  | 1.04 (1.01-1.07) | 0.96 (0.93-0.99)  | 1.03 (1.00-1.06) | 0.02      | 0.73      | 0.03<br>0  |

Data are LS means ± SEM, or geometric means (95% CI). \*ANCOVA for repeated measures, adjusted for sex, age, smoking, physical activity, fat intake, mean BMI. †Average effect of calcium density. ‡Interaction effect on average between calcium density and sex. §Interaction effect between calcium density and time. ||Interaction effect between calcium density and time
